# Supplementary material for: Eggshell membrane-derived metal sulfide catalysts for seawater splitting
Source: Royal Society of Chemistry journal article supplement (doi:10.1039/d4gc02017k), 2024-01-01
Supplement: d4gc02017k1.pdf [file d4gc02017k1.pdf]

# Supporting Information

## Eggshell membrane-derived metal sulfide catalysts for seawater splitting

Lingyu Cui,<sup>1,2</sup> Lan Zhang<sup>2,4,5\*</sup>, Yi Shen<sup>1,2,3\*</sup>

<sup>1</sup>School of Food Science and Engineering, South China University of Technology,  
Guangzhou 510640, China

<sup>2</sup>China-Singapore International Joint Research Institute, Guangzhou Knowledge City,  
Guangzhou 510663, China

<sup>3</sup>Overseas Expertise Introduction Center for Discipline Innovation of Food Nutrition  
and Human Health (111 Center), Guangzhou, 510641, China

<sup>4</sup>School of Mechanical and Aerospace Engineering, Nanyang Technological  
University, Singapore 639798, Singapore

<sup>5</sup>Energy Research Institute at NTU (ERI@N), Nanyang Technological University, 1  
CleanTech Loop, Singapore 637141, Singapore

\*Corresponding authors Emails: [zhanglan@ntu.edu.sg](mailto:zhanglan@ntu.edu.sg) (L. Z) and  
[feyshen@scut.edu.cn](mailto:feyshen@scut.edu.cn) (Y. S.)

**Table S1**

Composition of feedstock and pyrolysis temperature for sample syntheses.

| Samples                                    | Chemicals                                                  |                                                            |                                                            |        | Hydrothermal temperature /°C | Calcination temperature /°C |
|--------------------------------------------|------------------------------------------------------------|------------------------------------------------------------|------------------------------------------------------------|--------|------------------------------|-----------------------------|
|                                            | Co(NO <sub>3</sub> ) <sub>2</sub> ·6H <sub>2</sub> O /mmol | Fe(NO <sub>3</sub> ) <sub>3</sub> ·9H <sub>2</sub> O /mmol | Ni(NO <sub>3</sub> ) <sub>2</sub> ·6H <sub>2</sub> O /mmol | ESM /g |                              |                             |
| <b>Co<sub>9</sub>S<sub>8</sub>/ESM-T</b>   | Co <sub>9</sub> S <sub>8</sub> /ESM-200                    |                                                            |                                                            |        |                              | -                           |
|                                            | Co <sub>9</sub> S <sub>8</sub> /ESM-800                    | 0.9                                                        | -                                                          | -      | 200                          | 800                         |
|                                            | Co <sub>9</sub> S <sub>8</sub> /ESM-900                    |                                                            |                                                            |        |                              | 900                         |
|                                            | Co <sub>9</sub> S <sub>8</sub> /ESM-1000                   |                                                            |                                                            |        |                              | 1000                        |
| <b>Co<sub>8</sub>FeS<sub>8</sub>/ESM-T</b> | Co <sub>8</sub> FeS <sub>8</sub> /ESM-200                  |                                                            |                                                            |        |                              | -                           |
|                                            | Co <sub>8</sub> FeS <sub>8</sub> /ESM-800                  | 0.8                                                        | 0.1                                                        | -      | 200                          | 800                         |
|                                            | Co <sub>8</sub> FeS <sub>8</sub> /ESM-900                  |                                                            |                                                            |        |                              | 900                         |
|                                            | Co <sub>8</sub> FeS <sub>8</sub> /ESM-1000                 |                                                            |                                                            |        |                              | 1000                        |
| <b>FeS<sub>x</sub>/ESM-T</b>               | FeS <sub>x</sub> /ESM-200                                  |                                                            |                                                            |        |                              | -                           |
|                                            | FeS <sub>x</sub> /ESM-800                                  | -                                                          | 0.9                                                        | -      | 200                          | 800                         |
|                                            | FeS <sub>x</sub> /ESM-900                                  |                                                            |                                                            |        |                              | 900                         |
|                                            | FeS <sub>x</sub> /ESM-1000                                 |                                                            |                                                            |        |                              | 1000                        |
| <b>Ni<sub>9</sub>S<sub>8</sub>/ESM-T</b>   | Ni <sub>9</sub> S <sub>8</sub> /ESM-900                    | -                                                          | -                                                          | 0.9    | 200                          | 900                         |
| <b>Ni<sub>8</sub>FeS<sub>8</sub>/ESM-T</b> | Ni <sub>8</sub> FeS <sub>8</sub> /ESM-900                  | -                                                          | 0.1                                                        | 0.8    | 200                          | 900                         |

**Table S2**

Comparison of the OER performance of the Co-based electrocatalysts.

| Electrocatalyst                                 | Overpotential (mV) (j=10 mA cm <sup>-2</sup> ) | Tafel slope (mV dec <sup>-1</sup> ) | Electrolyte | Substrate | Loading (μg cm <sup>-2</sup> ) | Reference |
|-------------------------------------------------|------------------------------------------------|-------------------------------------|-------------|-----------|--------------------------------|-----------|
| Co <sub>8</sub> FeS <sub>8</sub> /ESM-900       | 270                                            | 51.04                               | 1 M KOH     | GCE       | 120                            | This work |
| CoPS                                            | 280.7                                          | 87                                  | 1 M KOH     | NF        | 769                            | R1        |
| NiCoSe S/BP                                     | 285                                            | 116                                 | 1 M KOH     | GCE       | 160                            | R2        |
| Fe-Co-Ni-S <sub>x</sub> /NF                     | 280                                            | 86                                  | 1 M KOH     | NF        | -                              | R3        |
| N/O-dual doped carbon coated CoNPs (EK-b)       | 378                                            | 60                                  | 1 M KOH     | CC        | 205                            | R4        |
| Co <sub>4</sub> Ni <sub>1</sub> S/CC            | 296                                            | 52                                  | 1 M KOH     | CC        | 520                            | R5        |
| CoS/MoS <sub>2</sub>                            | 281                                            | 79                                  | 1 M KOH     | GCE       | 132                            | R6        |
| FeCoNiP@P-rGO                                   | 354                                            | 155                                 | 1 M KOH     | -         | -                              | R7        |
| Co@S-MoO <sub>x</sub> NSs                       | 274                                            | 62                                  | 1 M KOH     | NF        | -                              | R8        |
| Co-Ni-S                                         | 368                                            | 86                                  | 1 M KOH     | CC        | 1000                           | R9        |
| Co@CoMoO <sub>x</sub> -α-CrOOH                  | 278                                            | 67.9                                | 1 M KOH     | NF        | -                              | R10       |
| CNO@NSG                                         | 287.4                                          | 66.3                                | 1 M KOH     | NF        | 100                            | R11       |
| Ni-Co/Ni-Co-O-P@CS                              | 310                                            | 151                                 | 1 M KOH     | -         | -                              | R12       |
| P, S-Co <sub>x</sub> O <sub>y</sub> /Cu@CuS NWs | 280                                            | 73.9                                | 1 M KOH     | CF        | 184                            | R13       |

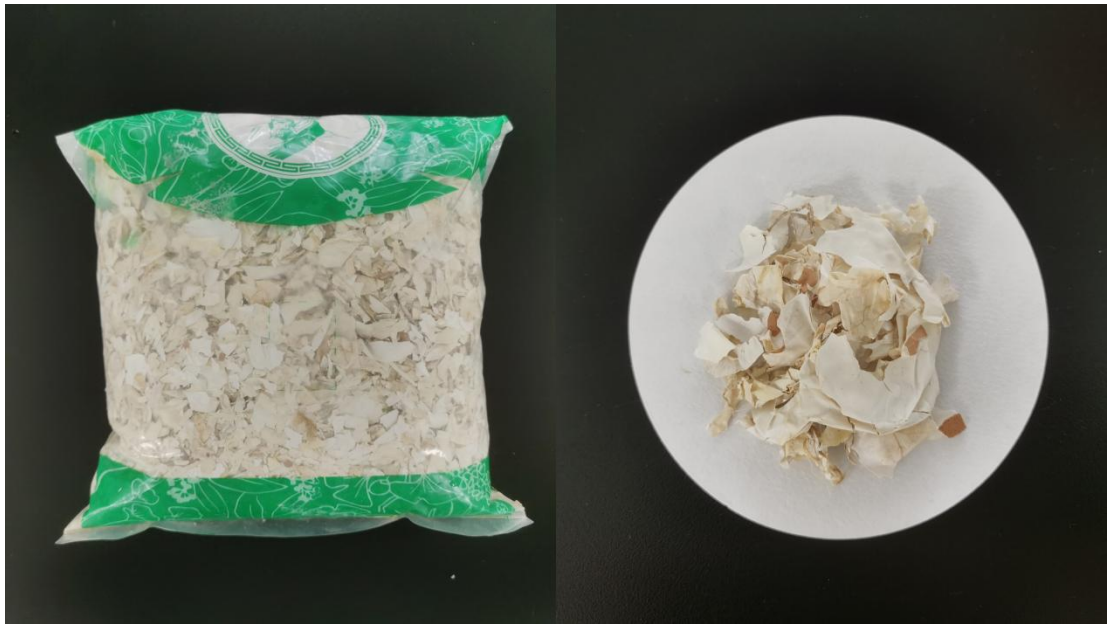

**Fig. S1** Digital photos of eggshell membranes.

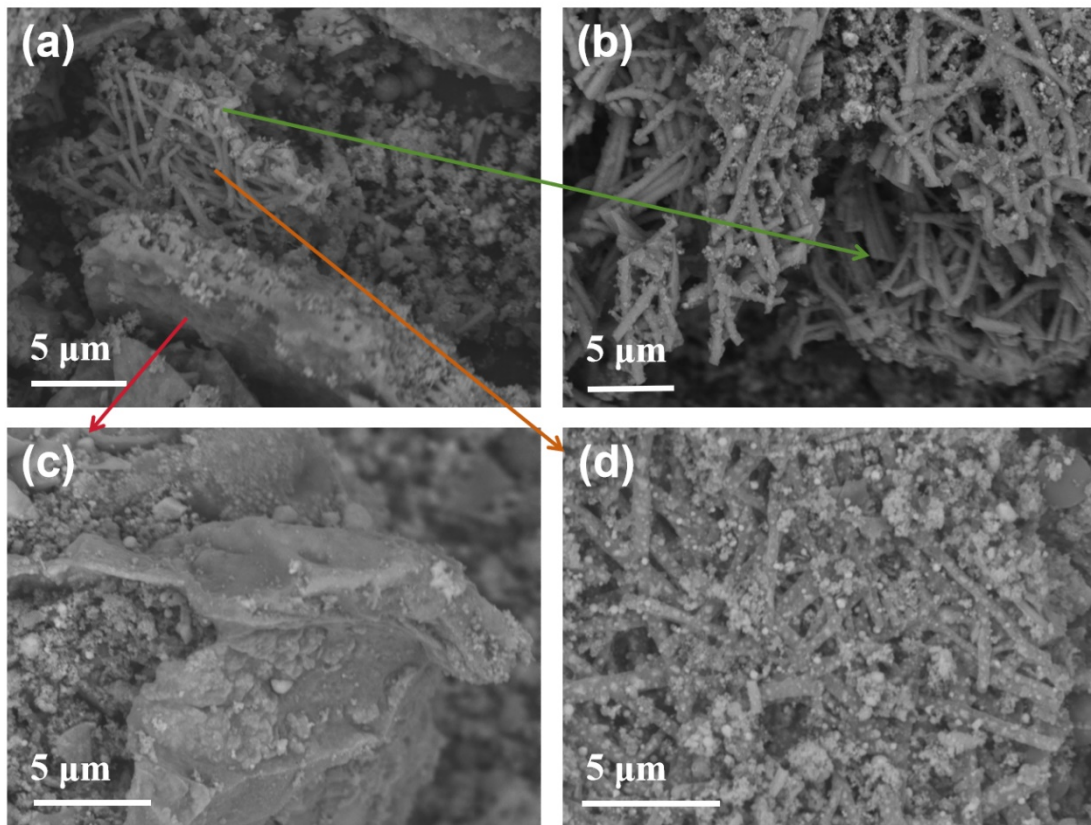

**Fig. S2** FESEM images of (a) individual ESM fragments, (b) the inner shell membrane, (c) the limiting shell membrane, and (d) the outer membrane after carbonization.

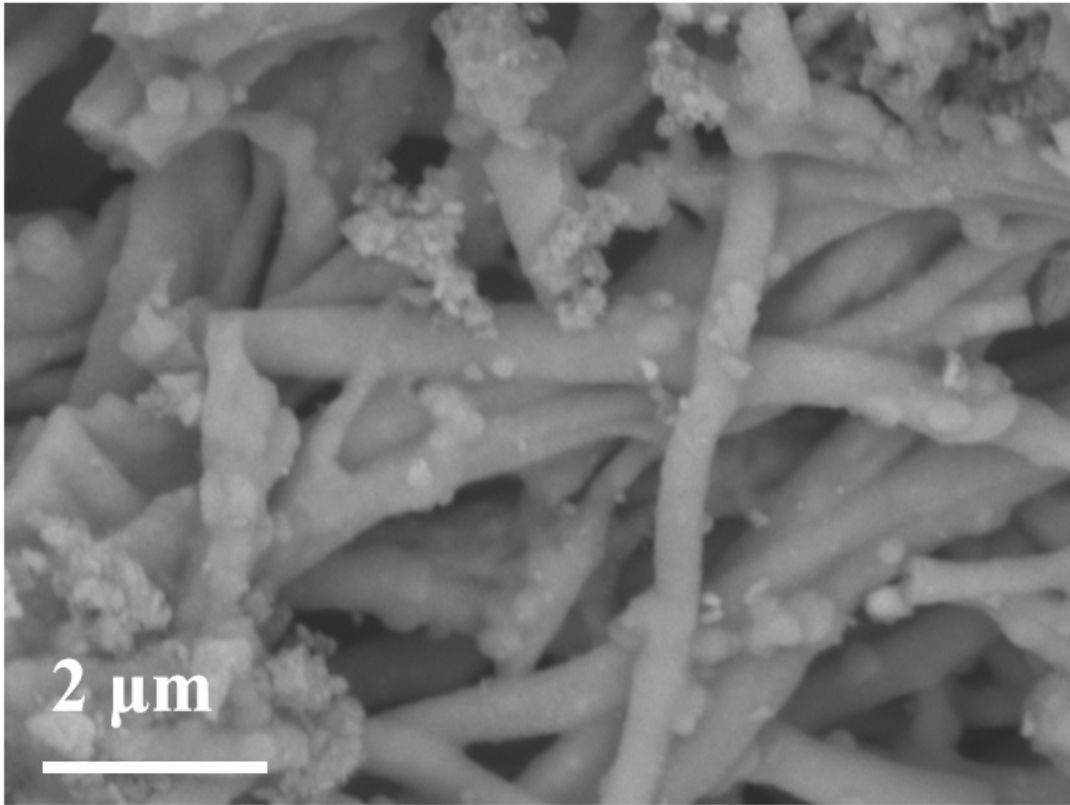

**Fig. S3** FESEM image of  $\text{Co}_9\text{S}_8/\text{ESM-900}$ .

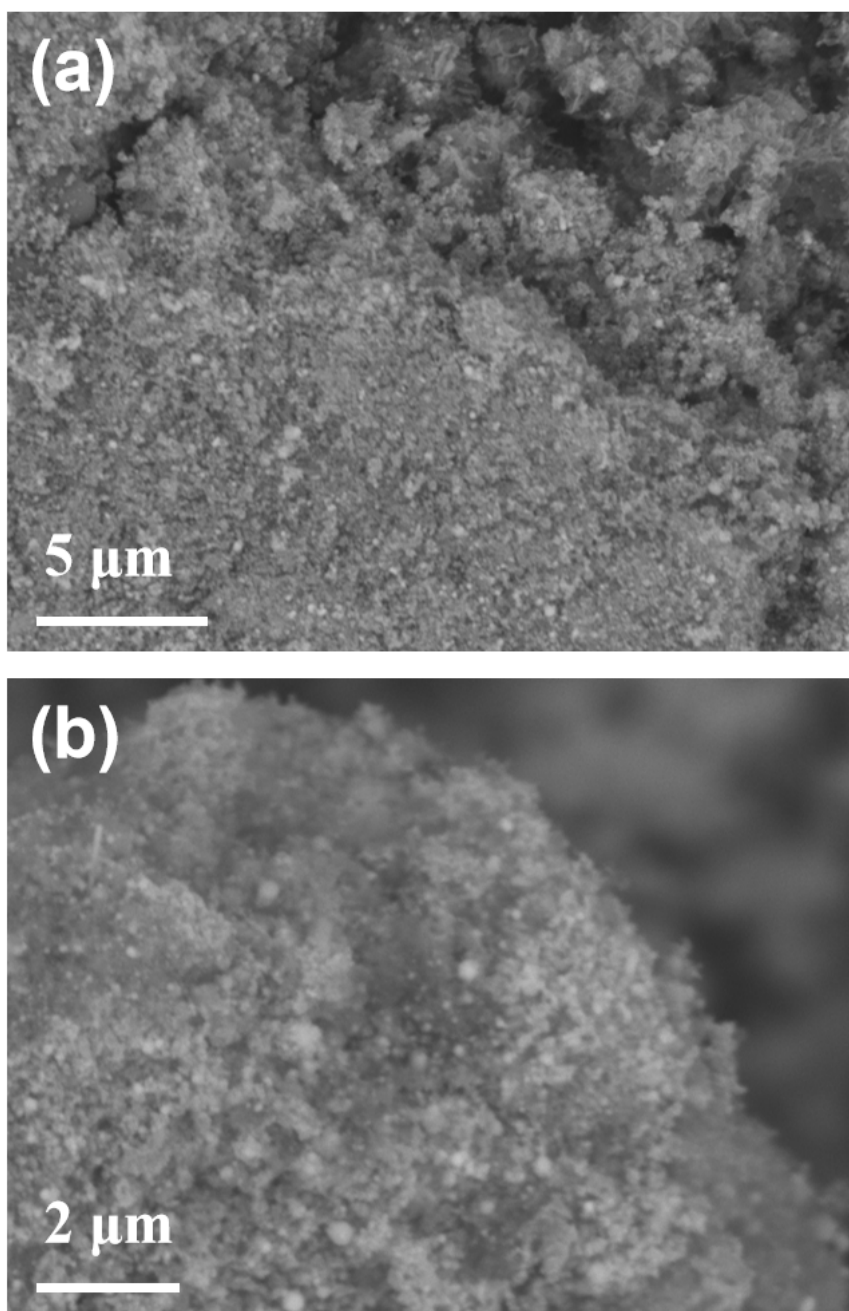

**Fig. S4** SEM images of FeS<sub>x</sub>/ESM-900.

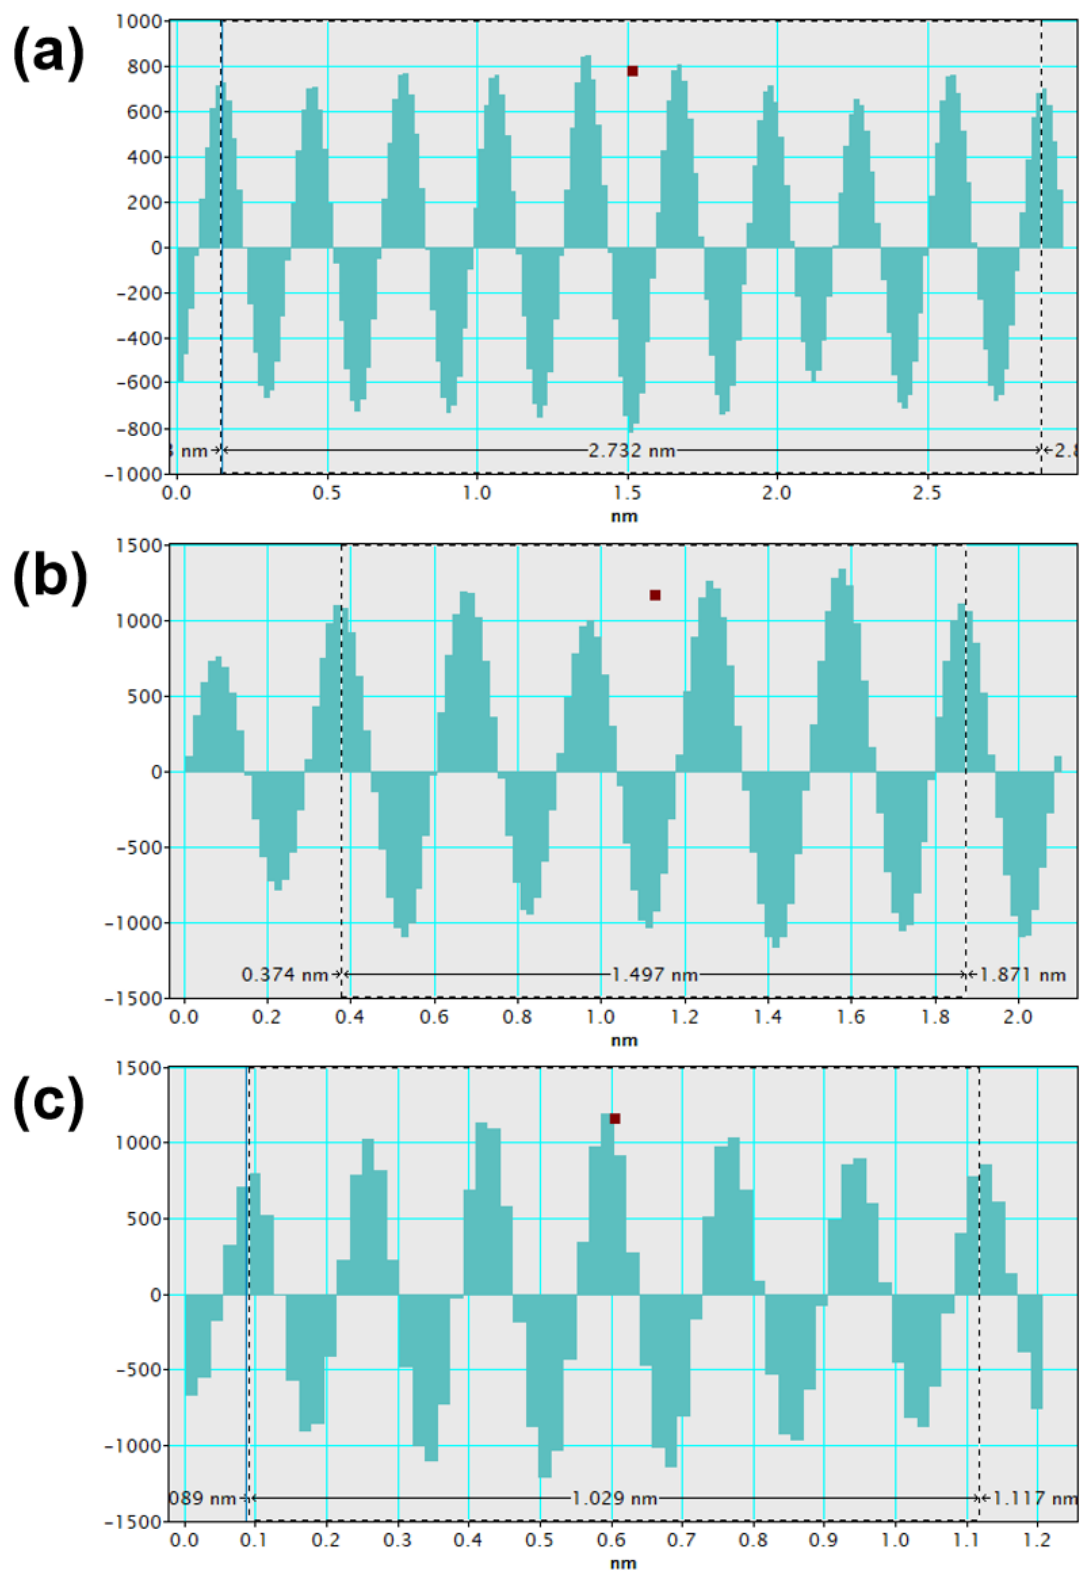

**Fig. S5** Intensity profiles within (a) region 1 and (b-c) region 2 shown in Fig. 1.



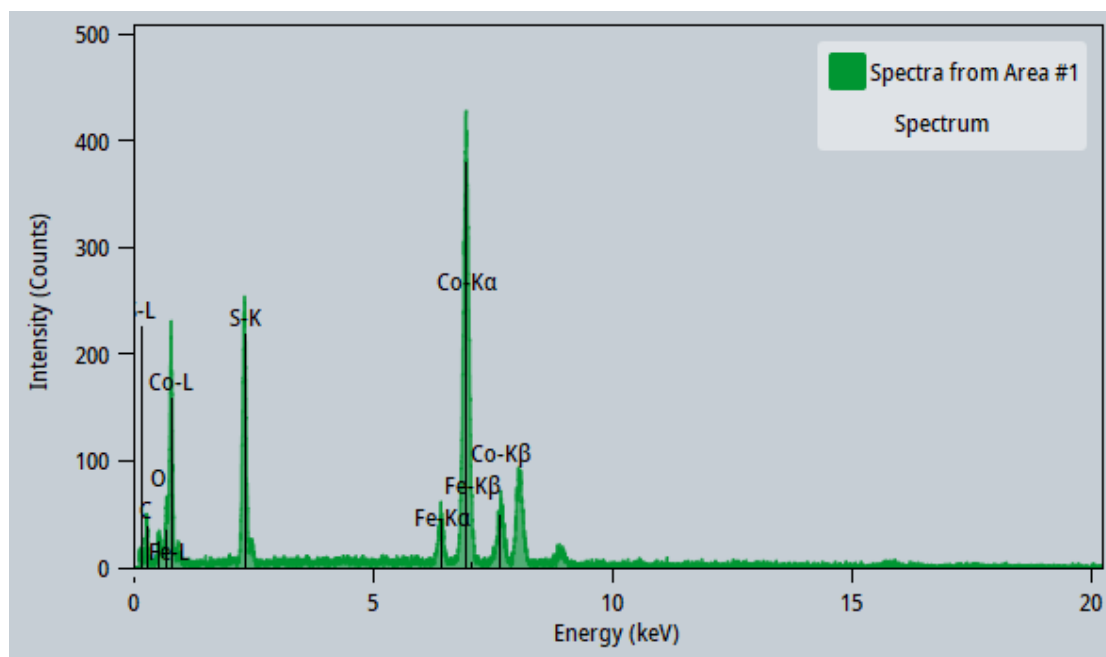

**Fig. S6** EDS spectrum of  $\text{Co}_8\text{FeS}_8/\text{ESM-900}$ .

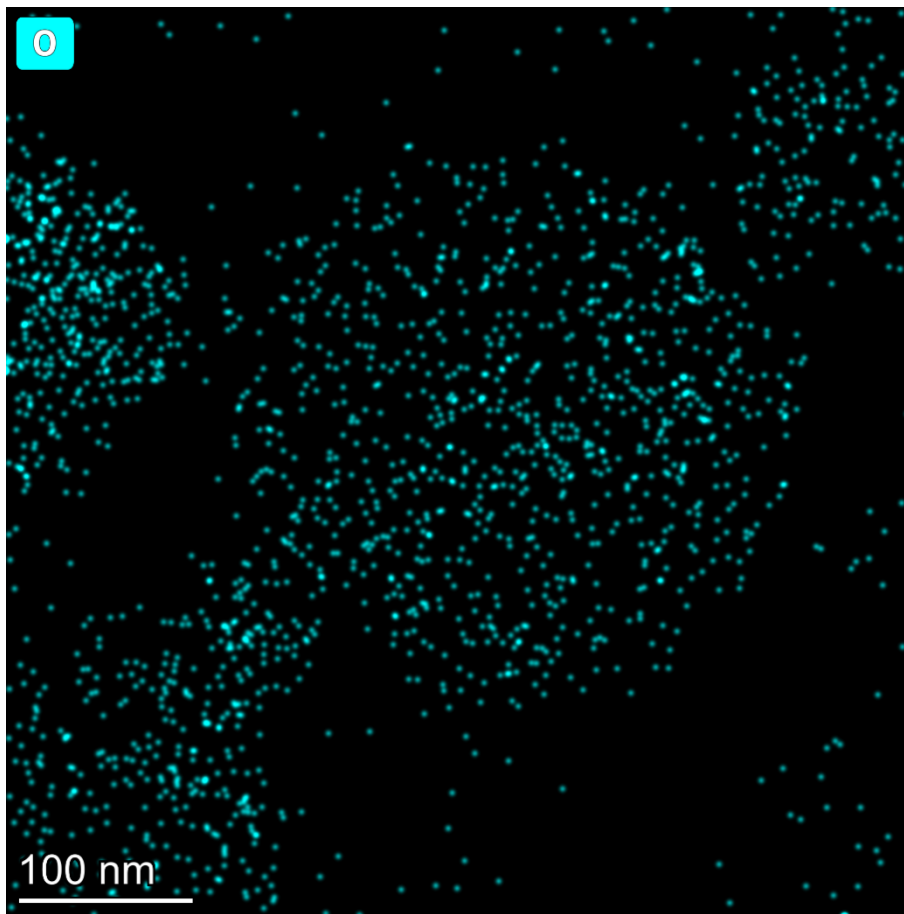

**Fig. S7** EDS element mappings of oxygen.

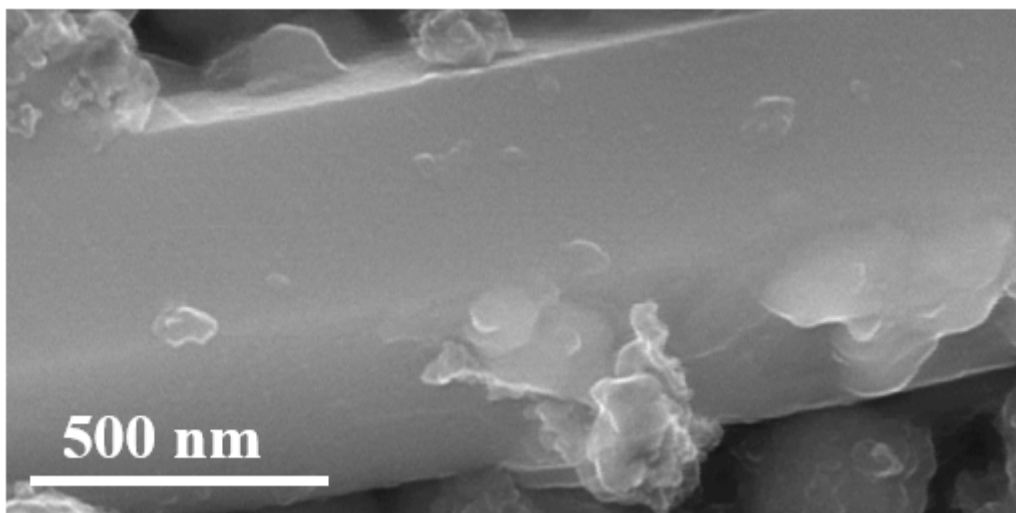

**Fig. S8** SEM images of the support.

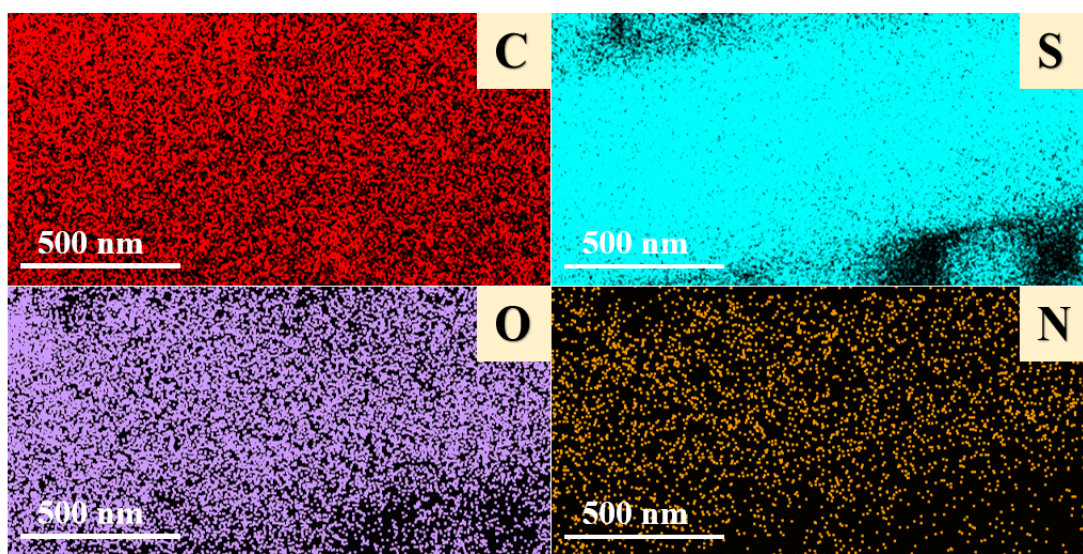

**Fig. S9** EDS element mapping images of the support.

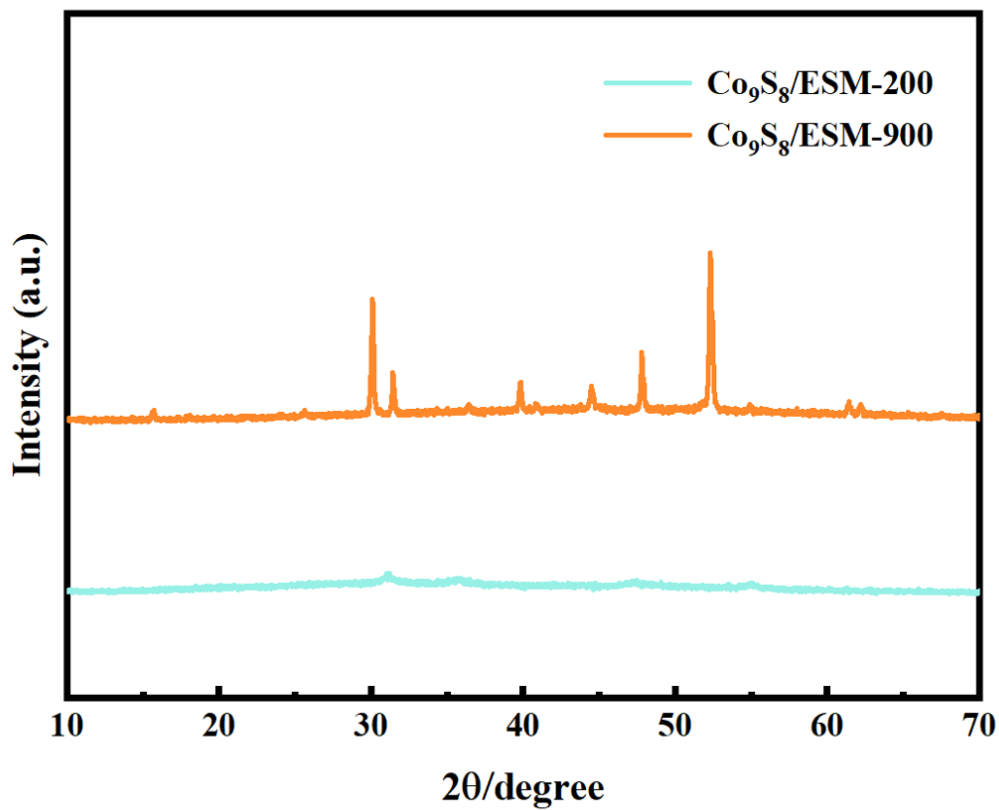

**Fig. S10** XRD patterns of  $\text{Co}_9\text{S}_8/\text{ESM-200}$  and  $\text{Co}_9\text{S}_8/\text{ESM-900}$ .

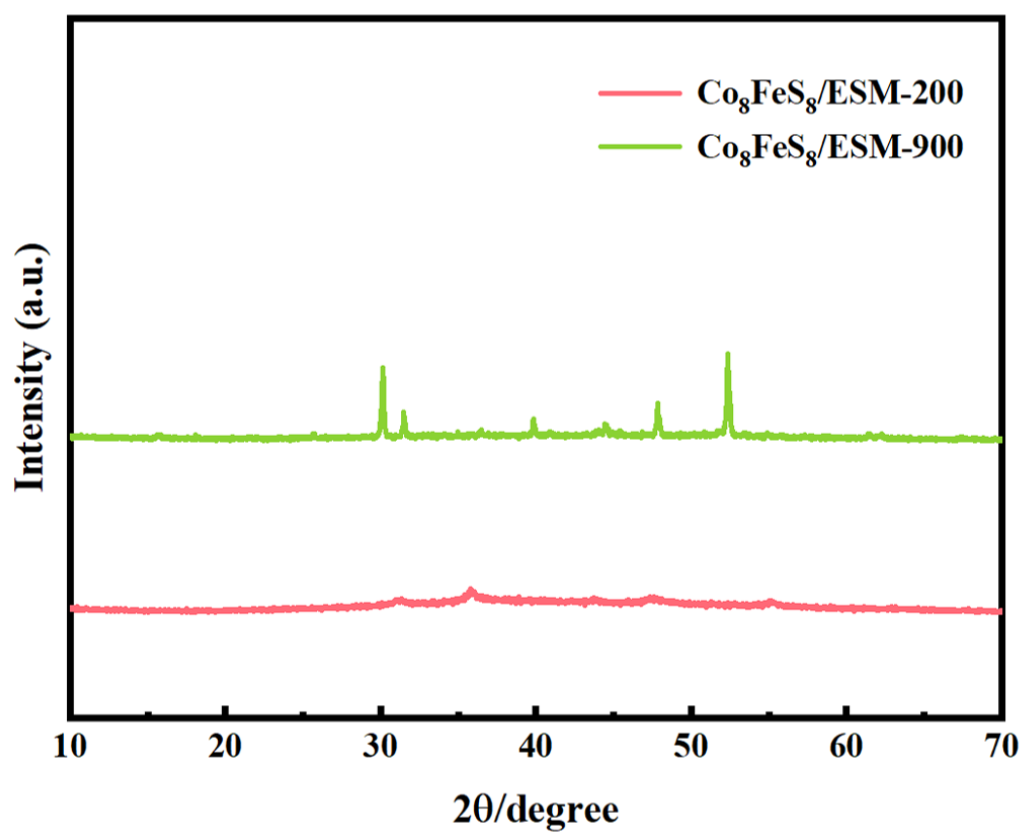

**Fig. S11** XRD patterns of  $\text{Co}_8\text{FeS}_8/\text{ESM-200}$  and  $\text{Co}_8\text{FeS}_8/\text{ESM-900}$ .

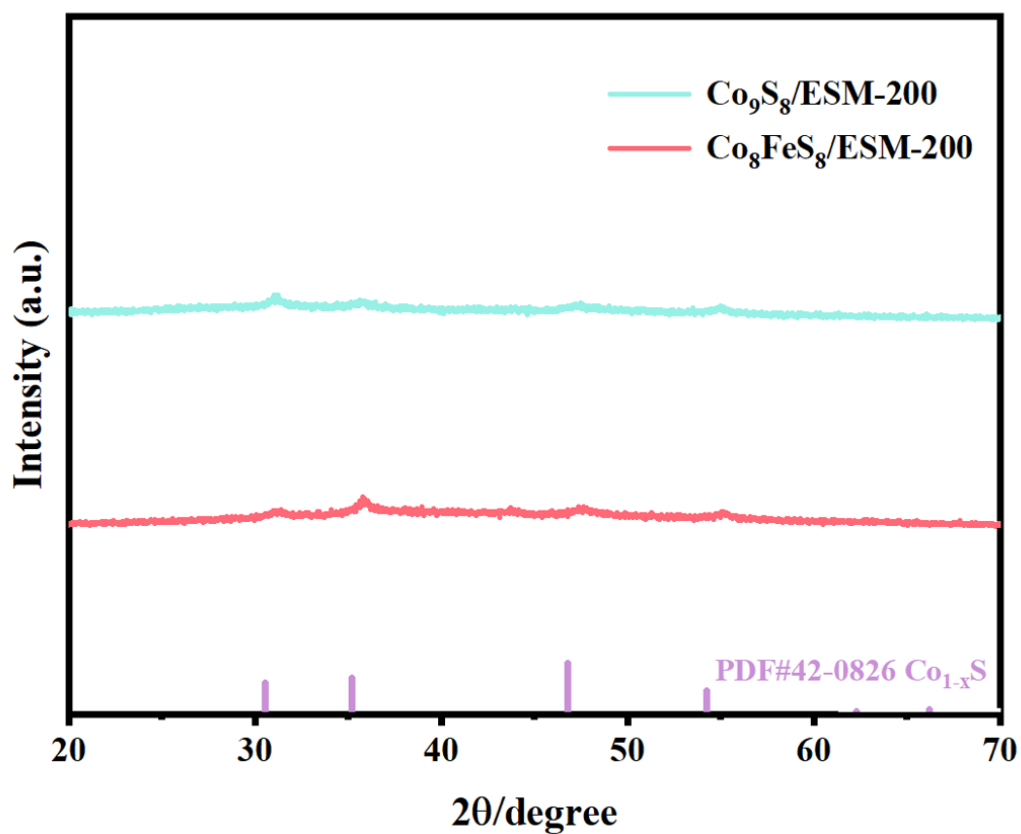

Fig. S12 XRD patterns of  $\text{Co}_9\text{S}_8/\text{ESM-200}$  and  $\text{Co}_8\text{FeS}_8/\text{ESM-200}$ .

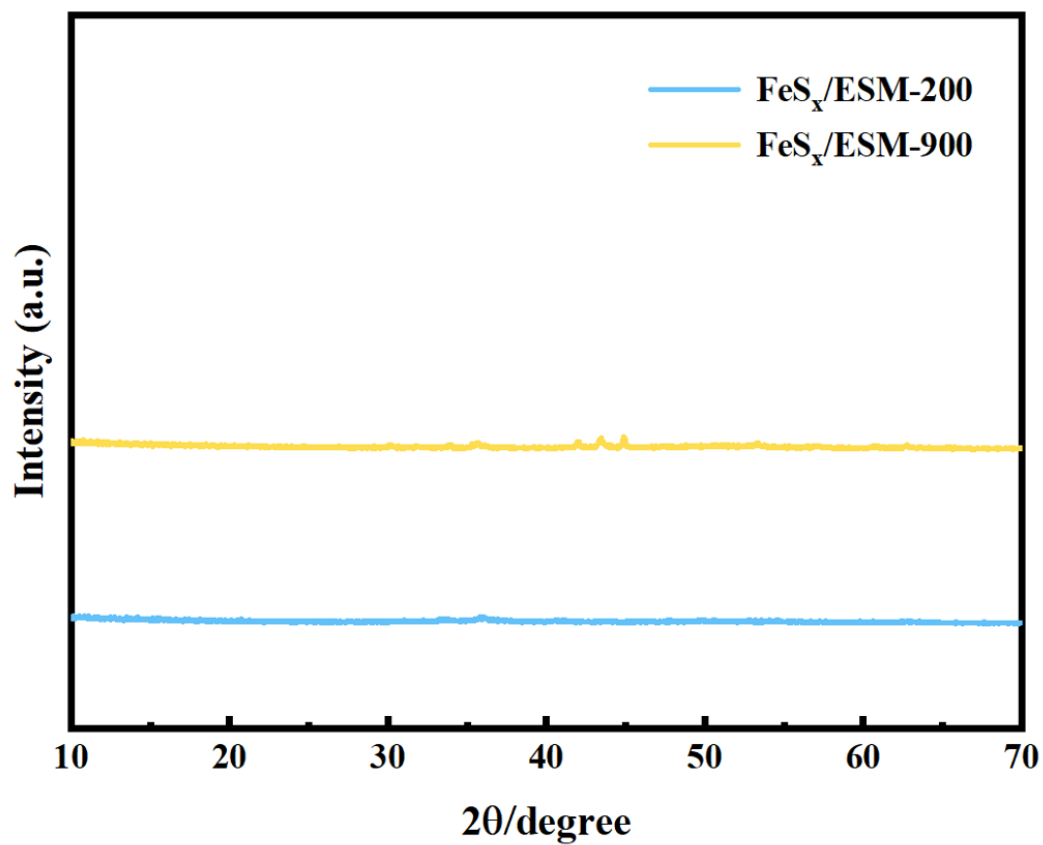

**Fig. S13** XRD patterns of FeS<sub>x</sub>/ESM-200 and FeS<sub>x</sub>/ESM-900.



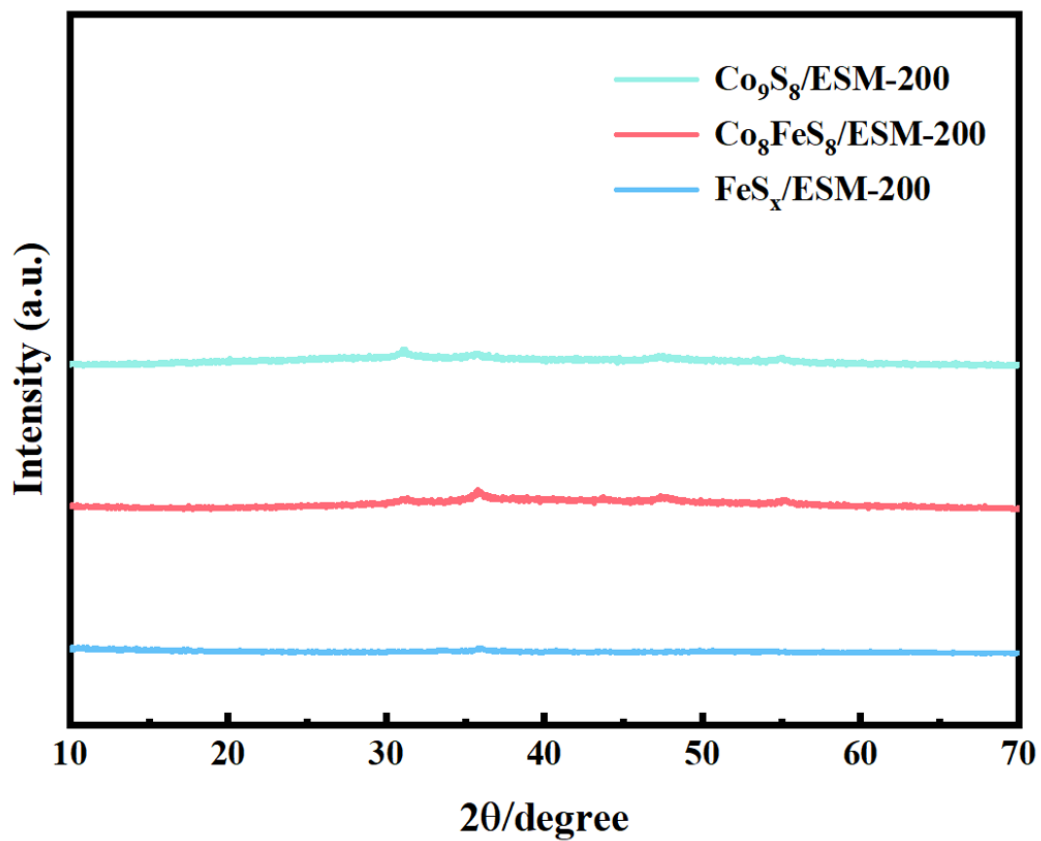

**Fig. S14** XRD patterns of Co<sub>9</sub>S<sub>8</sub>/ESM-200, Co<sub>8</sub>FeS<sub>8</sub>/ESM-200 and FeS<sub>x</sub>/ESM-200.

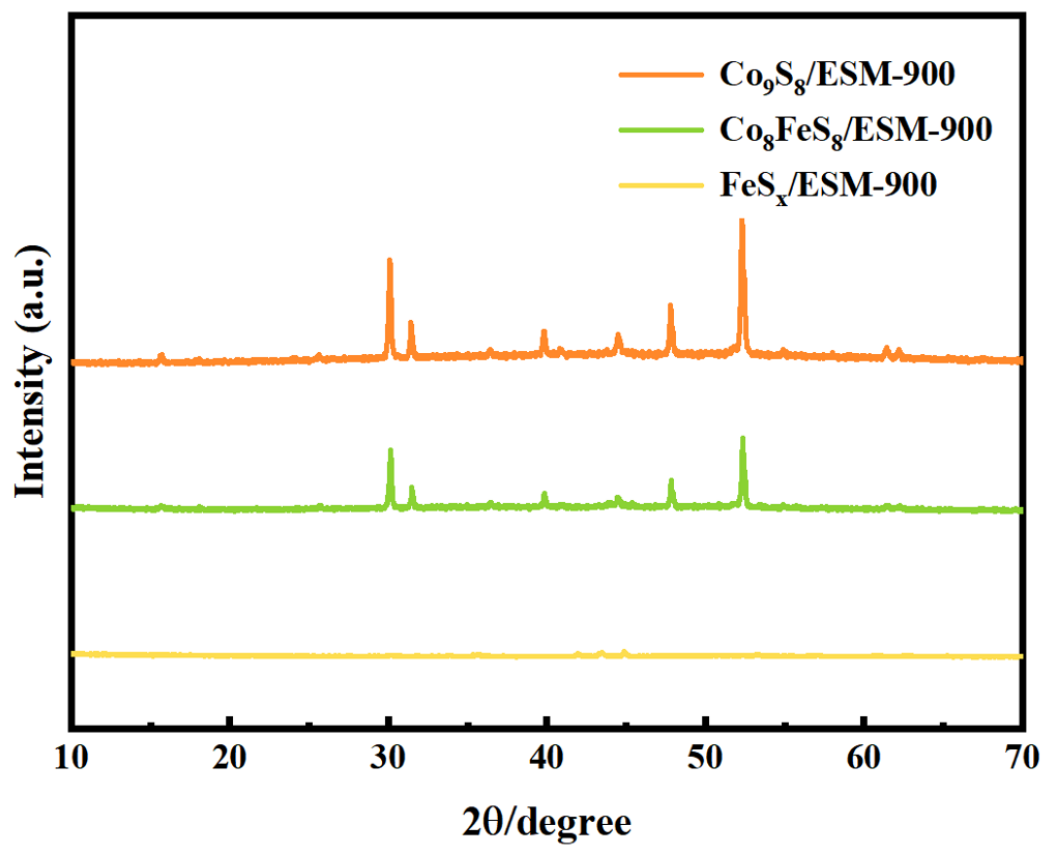

Fig. S15 XRD patterns of Co<sub>9</sub>S<sub>8</sub>/ESM-900, Co<sub>8</sub>FeS<sub>8</sub>/ESM-900 and FeS<sub>x</sub>/ESM-900.

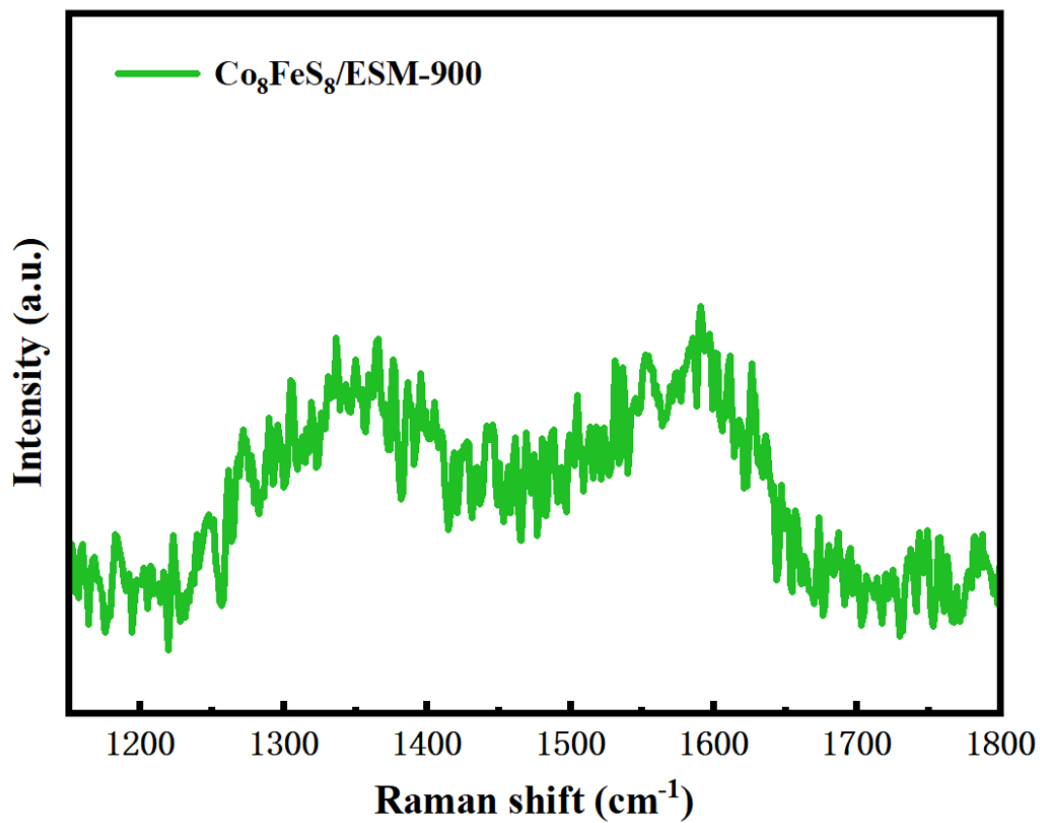

**Fig. S16** Raman spectrum of  $\text{Co}_8\text{FeS}_8/\text{ESM-900}$ .

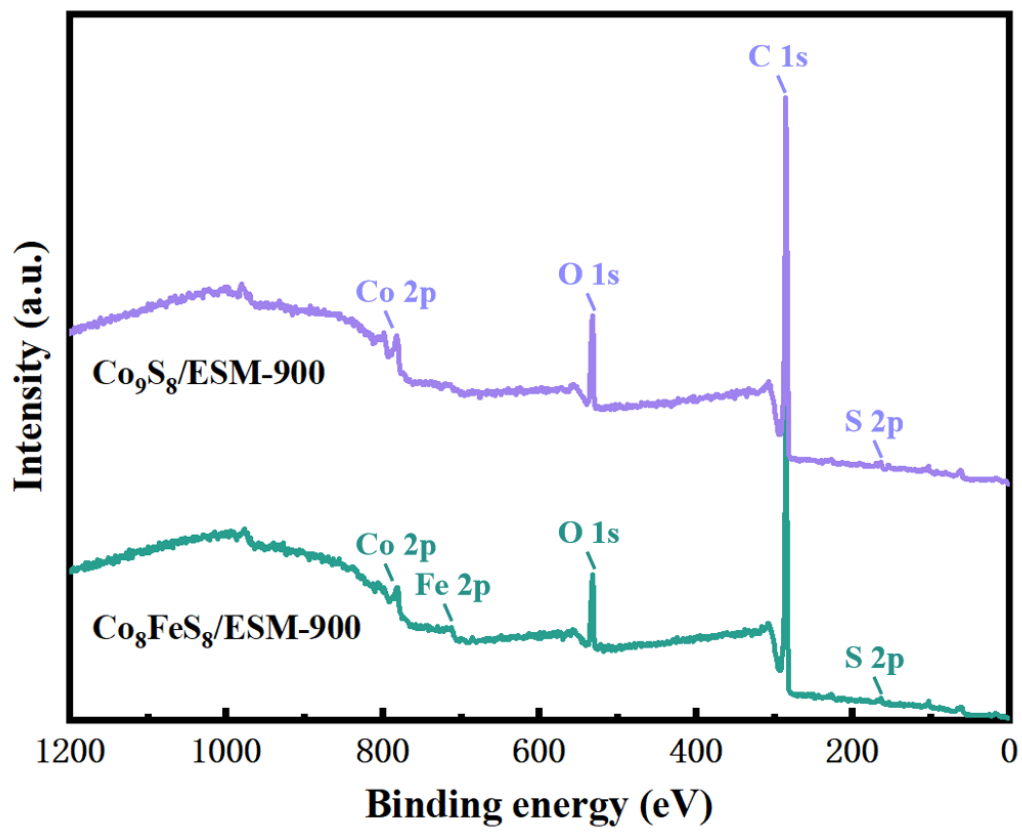

Fig. S17 Surveys spectra of  $\text{Co}_9\text{S}_8/\text{ESM-900}$  and  $\text{Co}_8\text{FeS}_8/\text{ESM-900}$ .

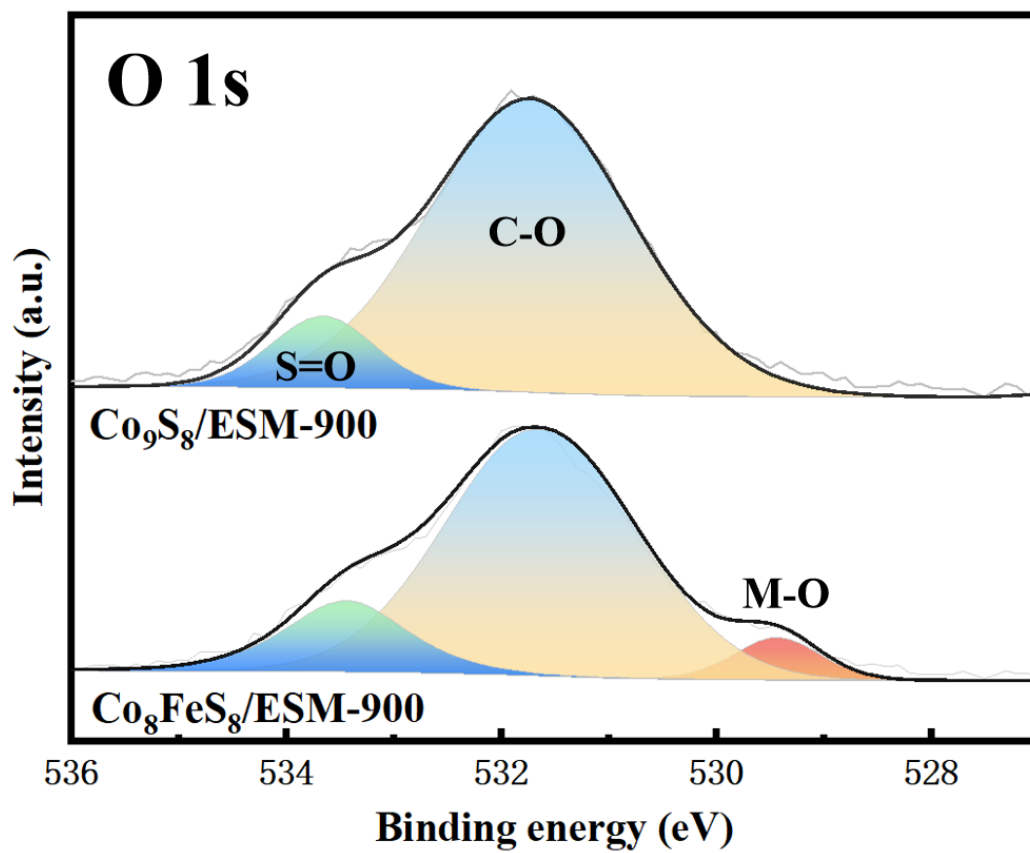

Fig. S18 XPS spectra of O1s.

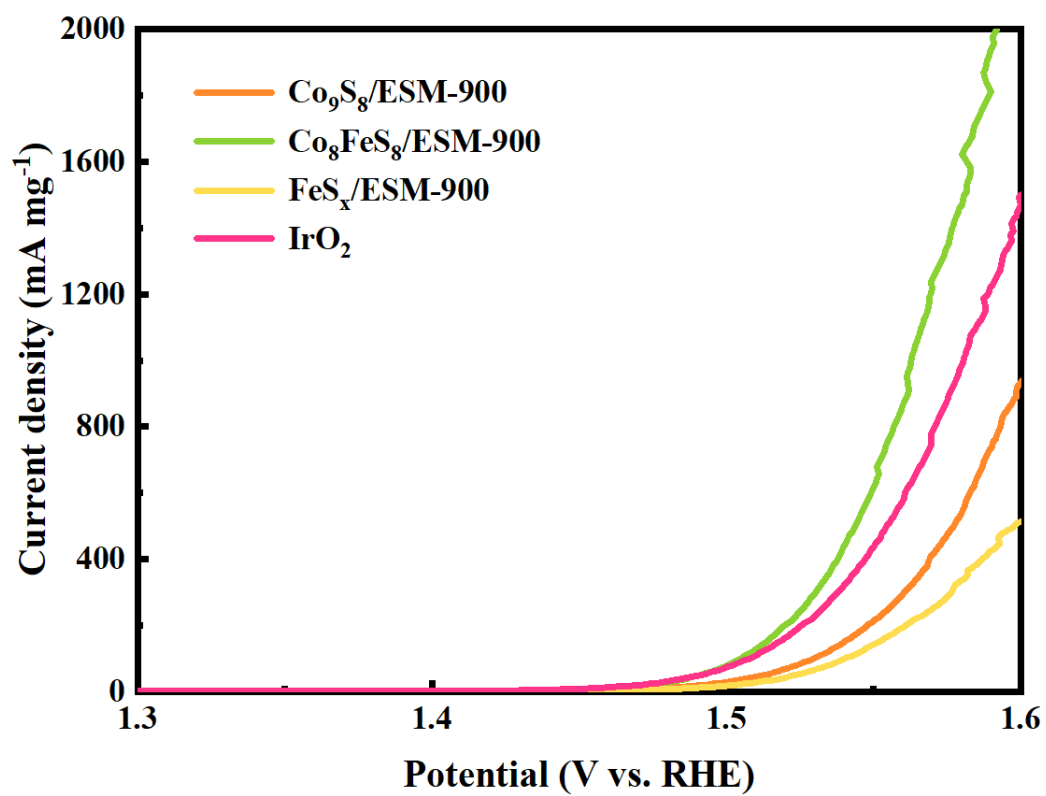

**Fig. S19** Mass-normalized LSV curves of Co<sub>9</sub>S<sub>8</sub>/ESM-900, Co<sub>8</sub>FeS<sub>8</sub>/ESM-900, FeS<sub>x</sub>/ESM-900 and IrO<sub>2</sub> recorded in 1 M KOH.

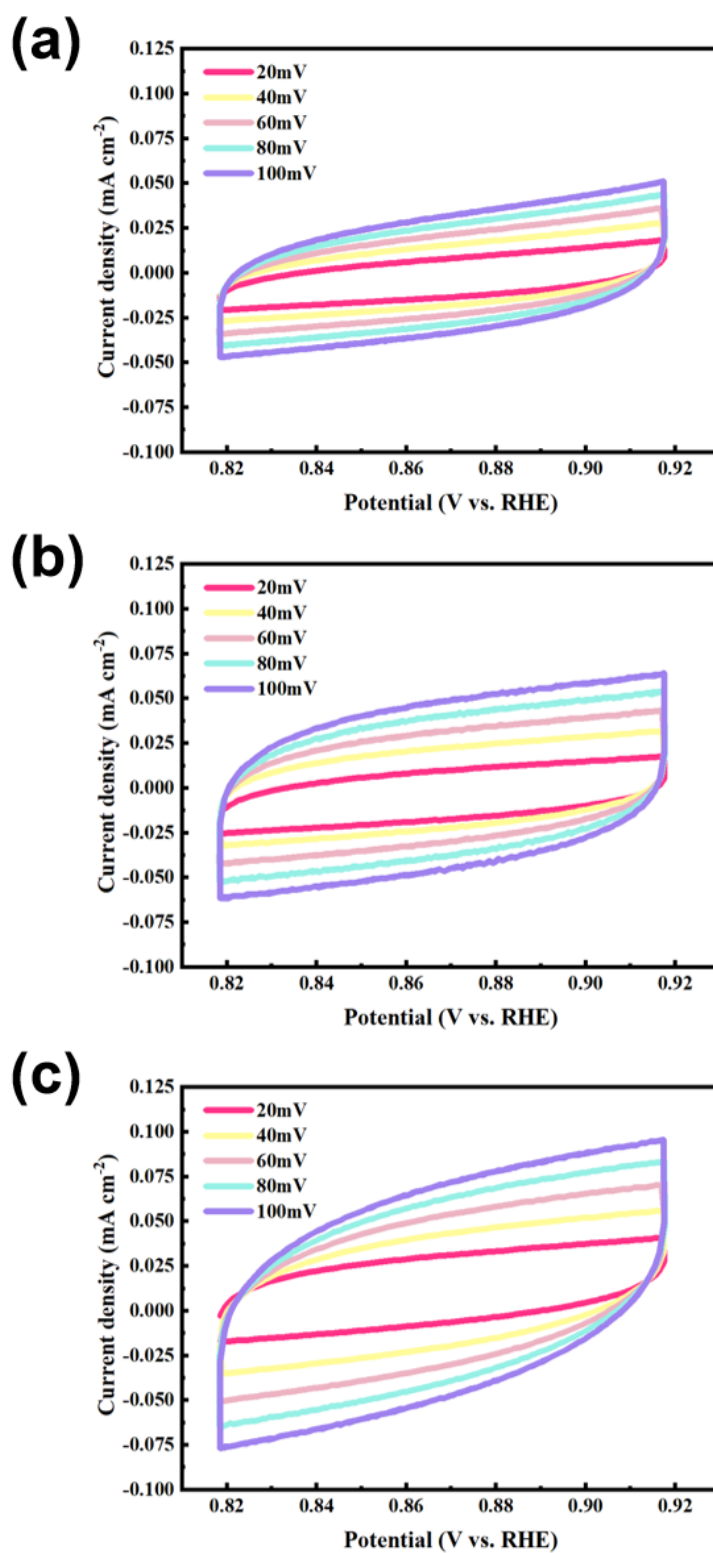

**Fig. S20** CVs of (a) Co<sub>9</sub>S<sub>8</sub>/ESM-900, (b) Co<sub>8</sub>FeS<sub>8</sub>/ESM-900, and (c) FeS<sub>x</sub>/ESM-900 recorded with varying scan rates.

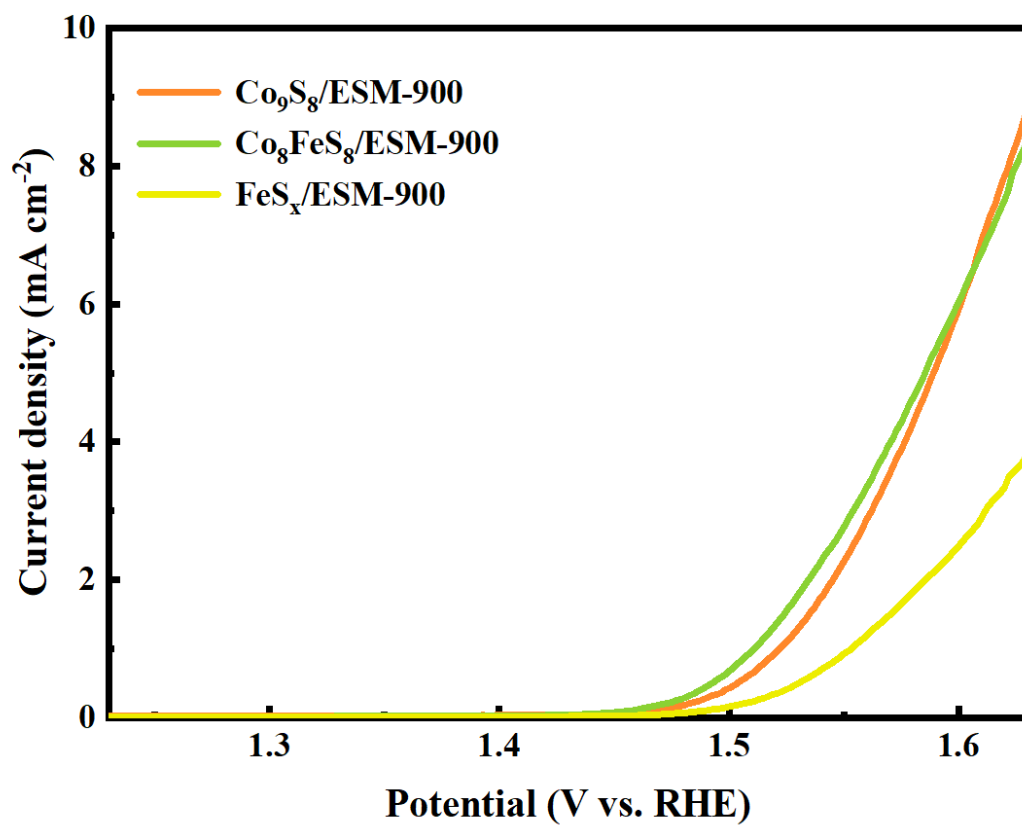

**Fig. S21** ECSA-normalized LSV curves of  $\text{Co}_9\text{S}_8/\text{ESM-900}$ ,  $\text{Co}_8\text{FeS}_8/\text{ESM-900}$  and  $\text{FeS}_x/\text{ESM-900}$  recorded in 1 M KOH.



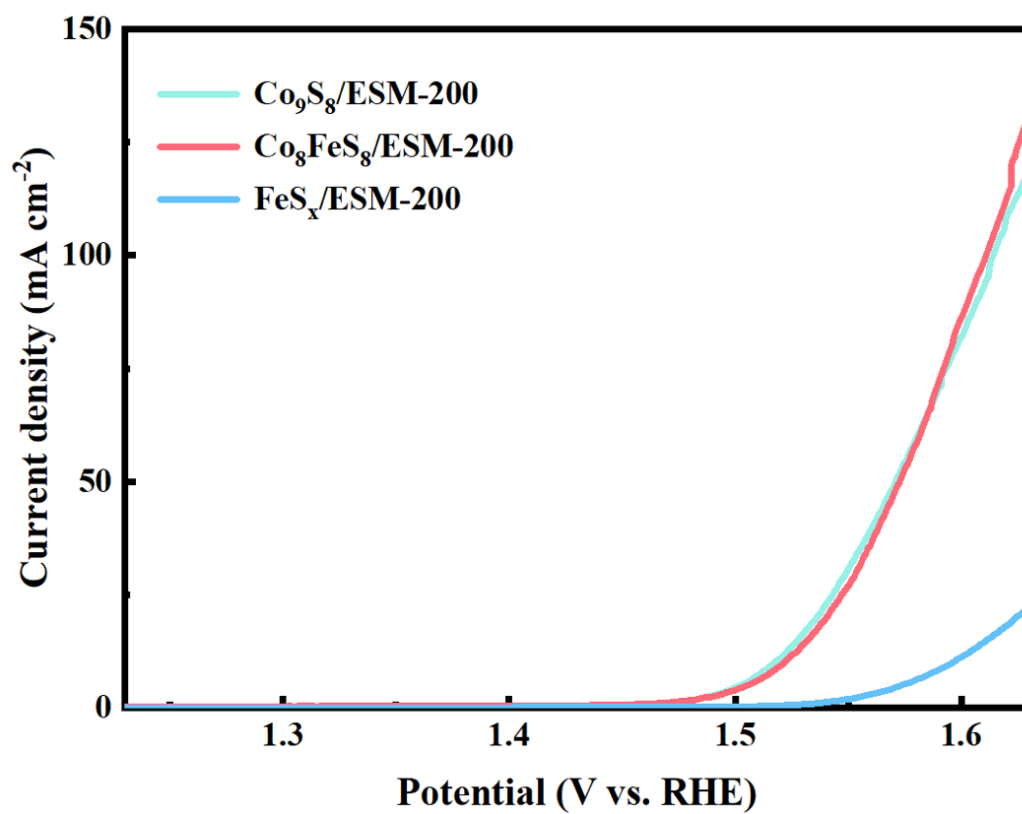

Fig. S22 LSV curves of  $\text{Co}_9\text{S}_8/\text{ESM-200}$ ,  $\text{Co}_8\text{FeS}_8/\text{ESM-200}$  and  $\text{FeS}_x/\text{ESM-200}$  recorded in 1 M KOH.

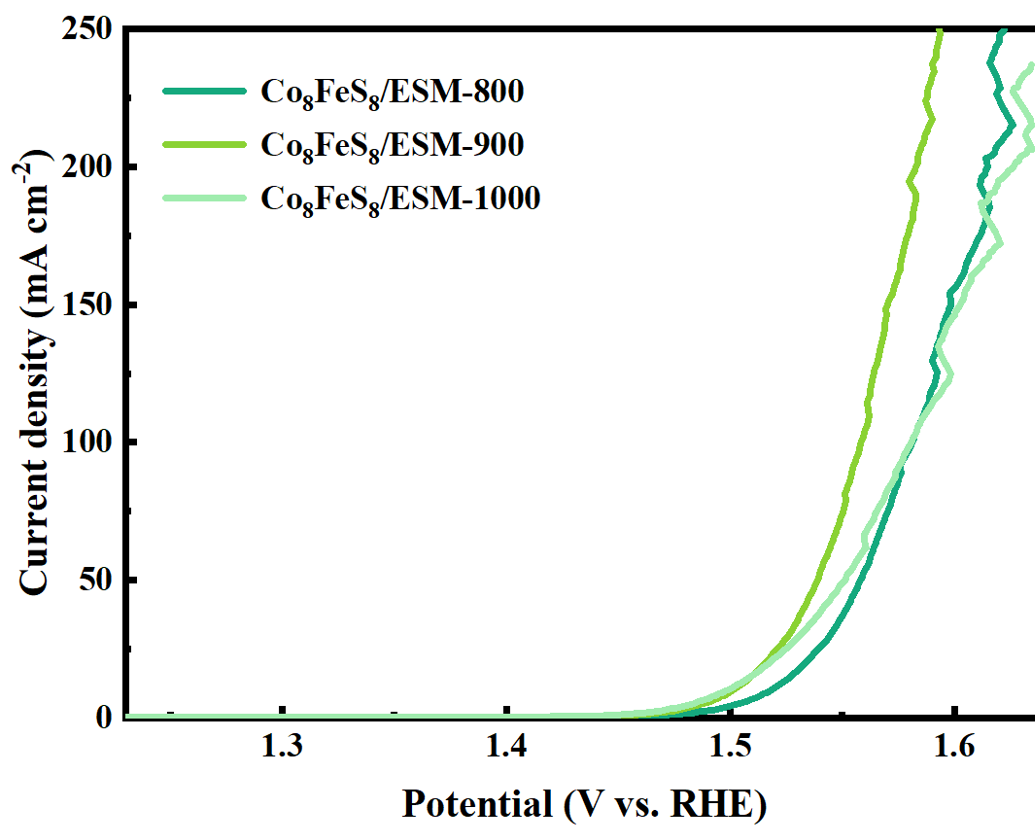

**Fig. S23** LSV curves of  $\text{Co}_8\text{FeS}_8/\text{ESM-800}$ ,  $\text{Co}_8\text{FeS}_8/\text{ESM-900}$  and  $\text{Co}_8\text{FeS}_8/\text{ESM-1000}$  recorded in 1 M KOH.

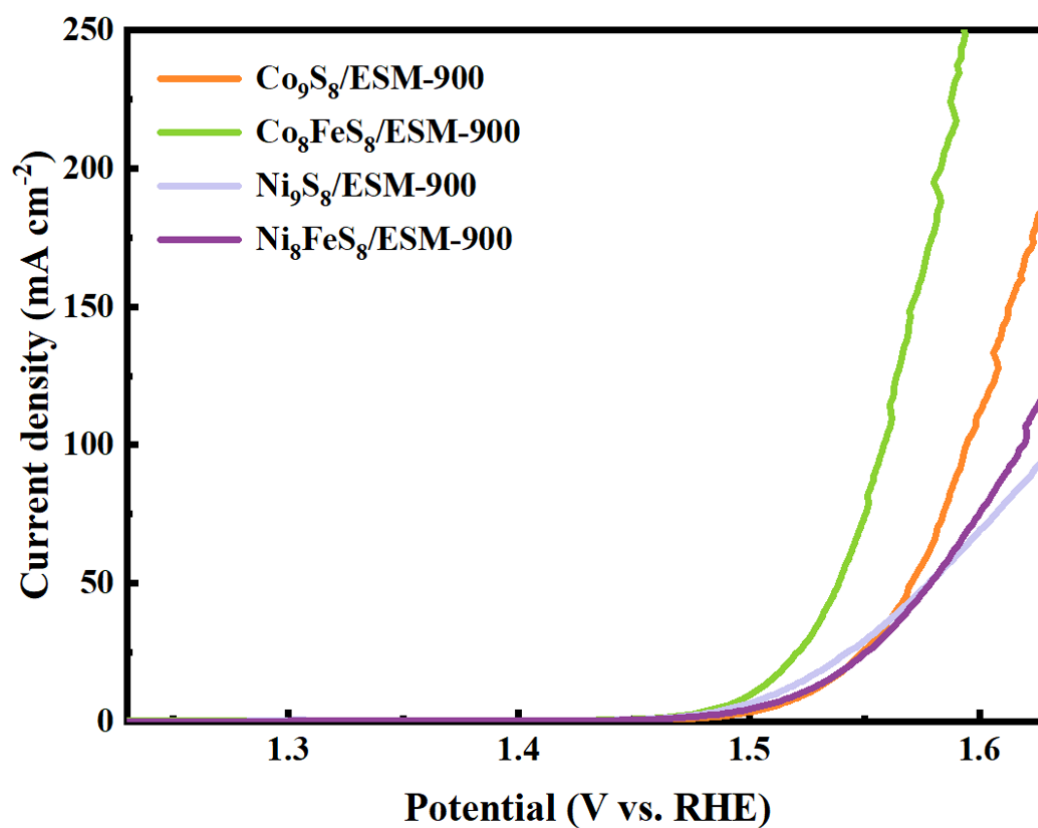

**Fig. S24** LSV curves of Co<sub>9</sub>S<sub>8</sub>/ESM-900, Co<sub>8</sub>FeS<sub>8</sub>/ESM-900, Ni<sub>9</sub>S<sub>8</sub>/ESM-900 and Ni<sub>8</sub>FeS<sub>8</sub>/ESM-900 recorded in 1 M KOH.

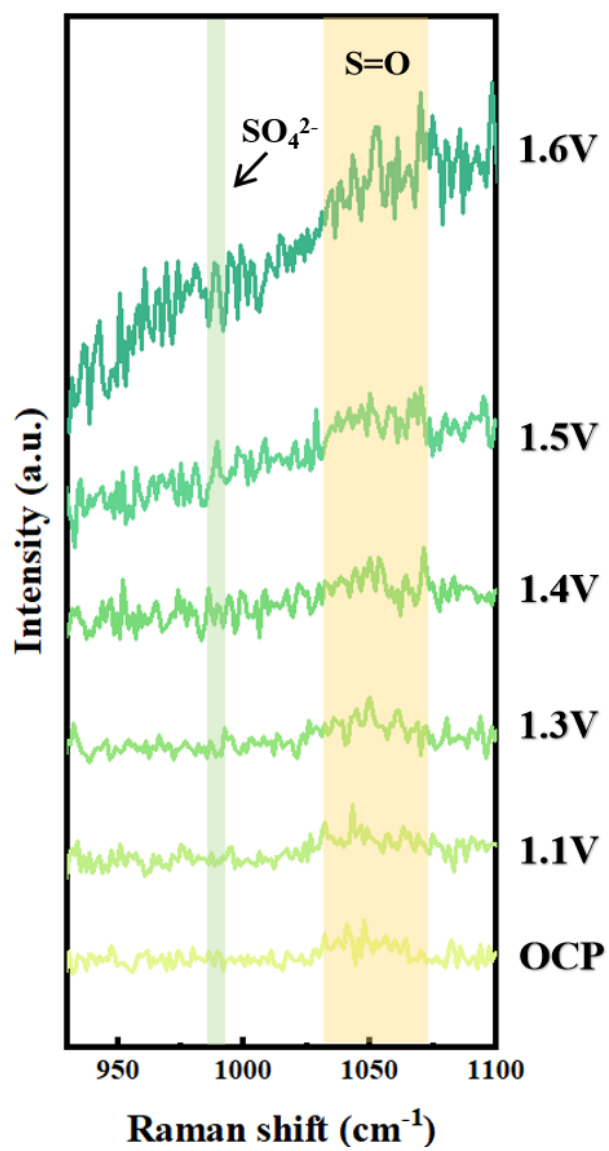

**Fig. S25** In situ Raman spectroscopy of Co<sub>8</sub>FeS<sub>8</sub>/ESM-900.

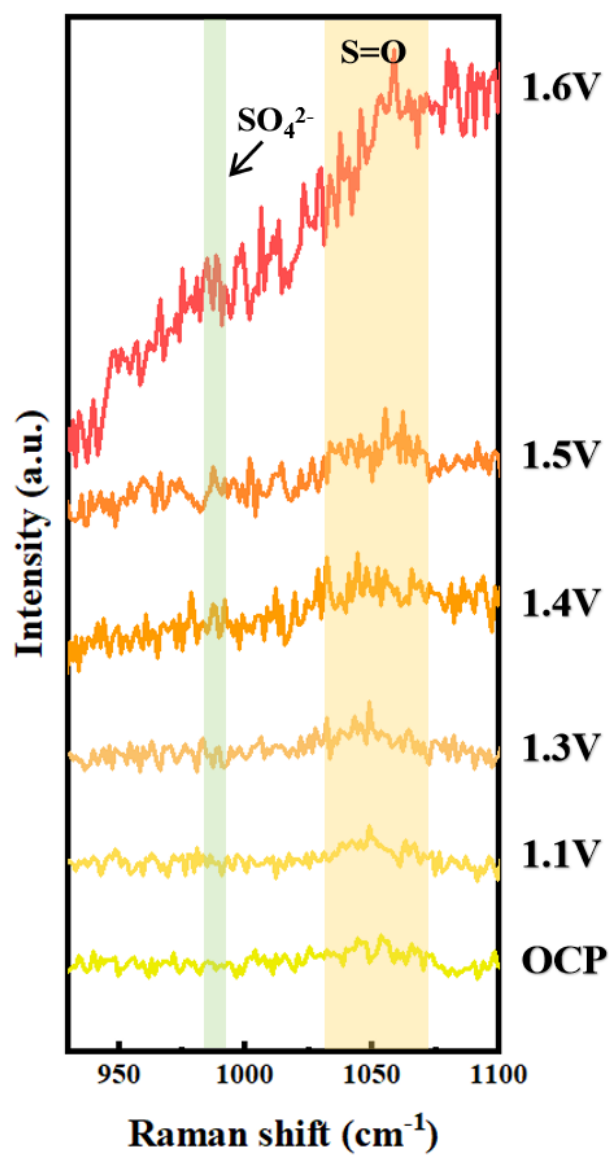

Fig. S26 In situ Raman spectroscopy of Co<sub>9</sub>S<sub>8</sub>/ESM-900.

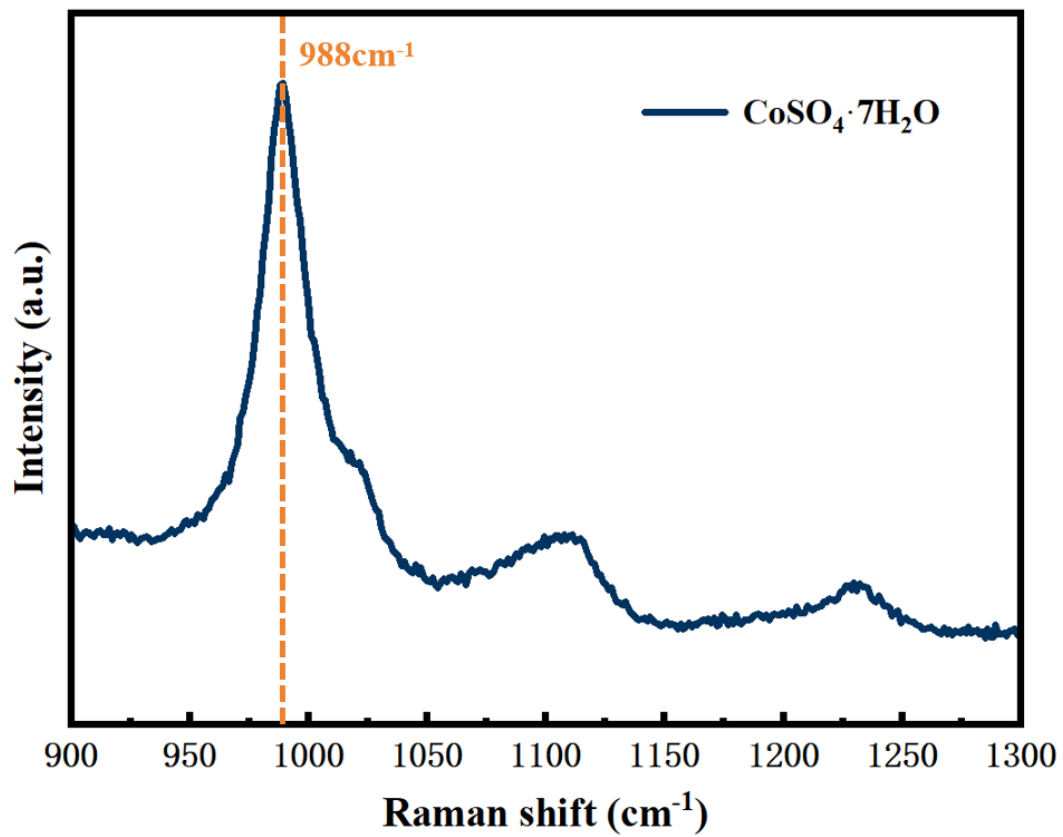

Fig. S27 Raman spectroscopy of  $\text{CoSO}_4 \cdot 7\text{H}_2\text{O}$ .

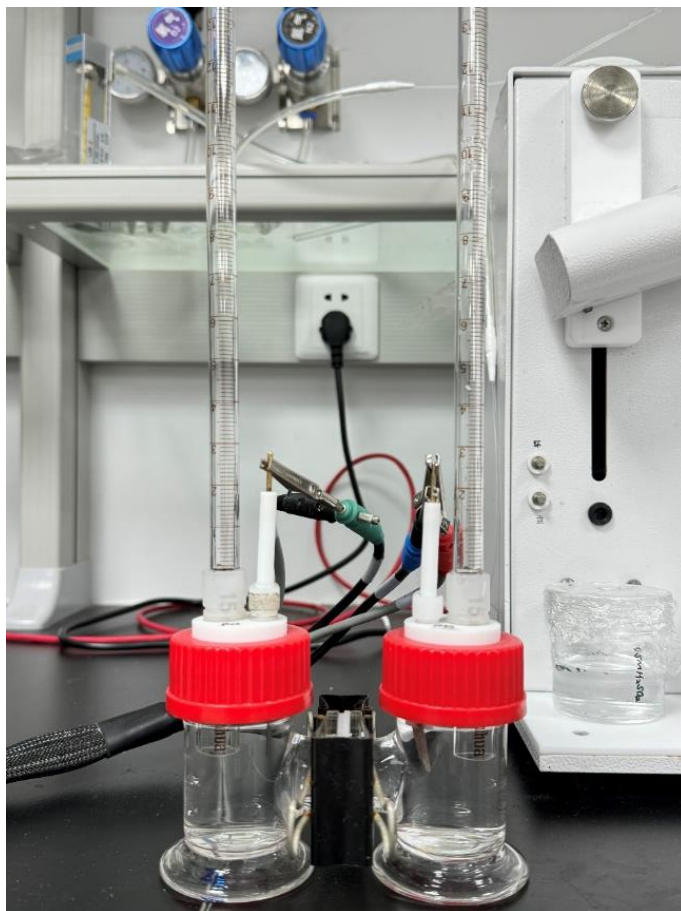

**Fig. S28** Schematic diagram of the apparatus for the Faraday efficiency test.

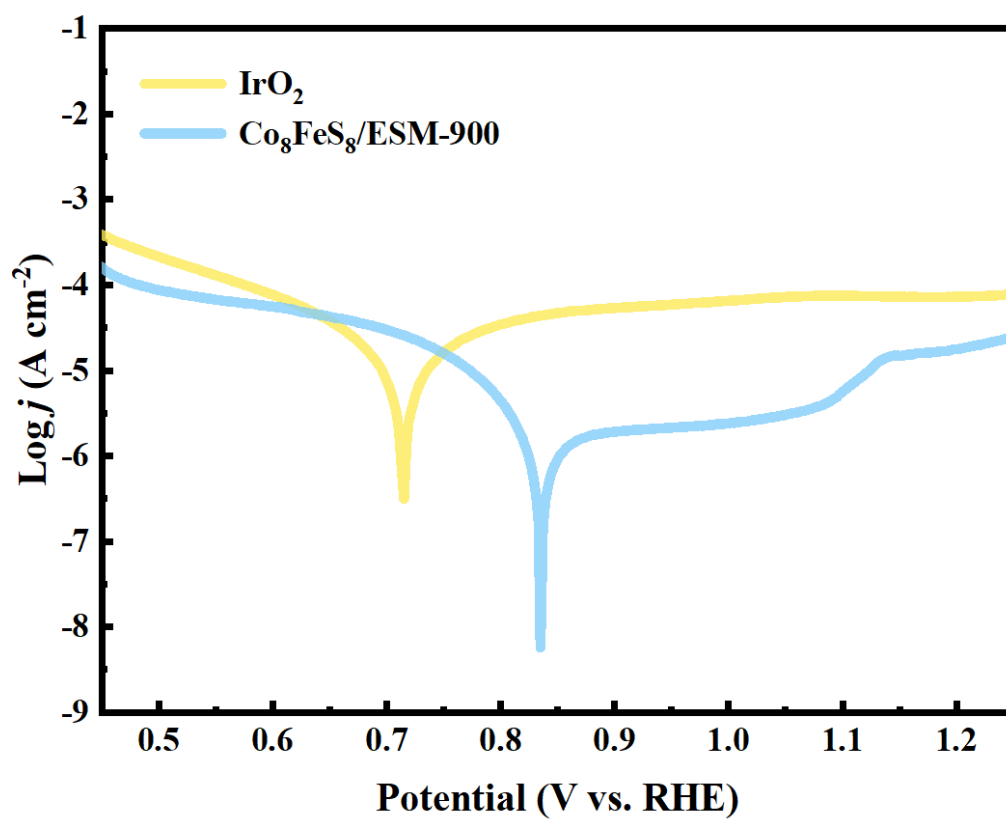

**Fig. S29** Corrosion polarization curves of Co<sub>8</sub>FeS<sub>8</sub>/ESM-900 and IrO<sub>2</sub> in 1 M KOH + seawater.



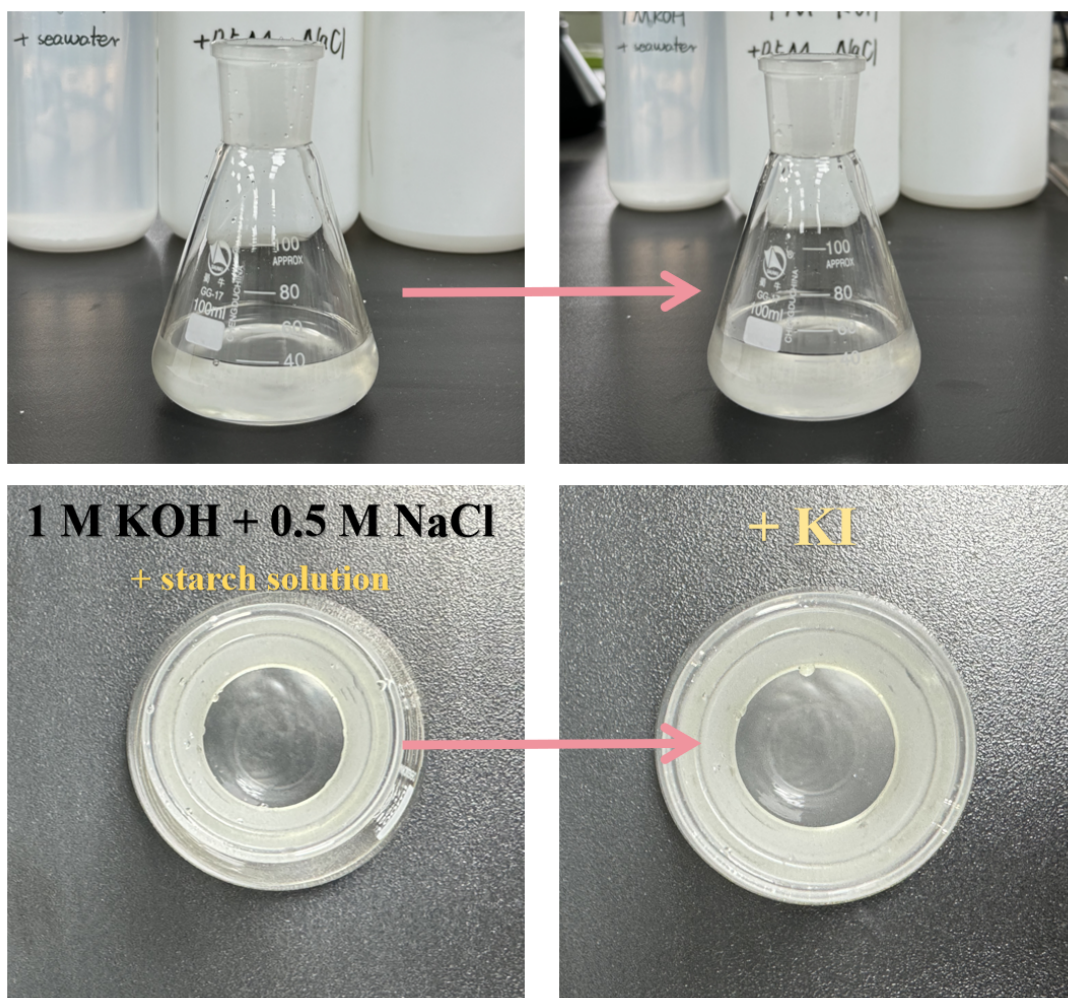

**Fig. S30** Digital photos of illustrating the determination of  $\text{ClO}^-$  in simulated seawater.

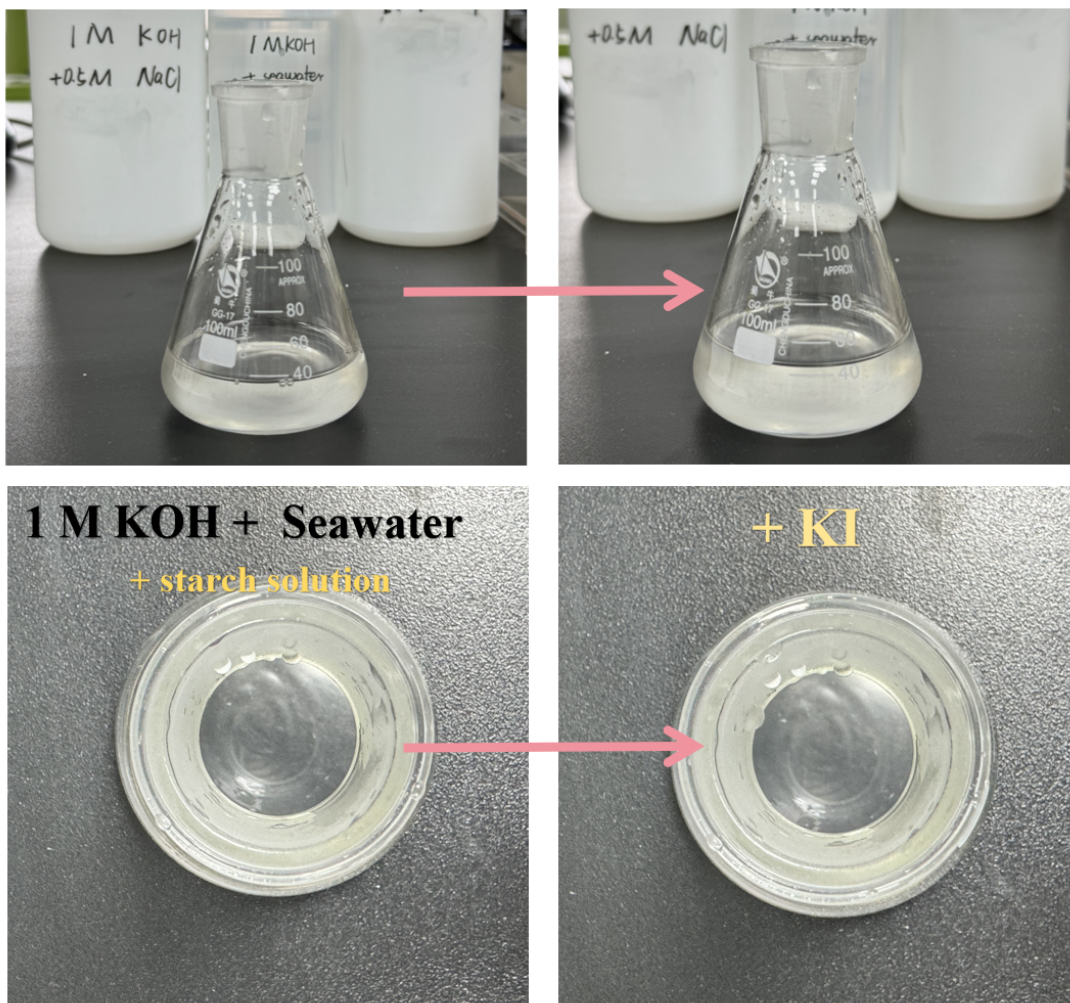

**Fig. S31** Digital photos of illustrating the determination of  $\text{ClO}^-$  in natural seawater.

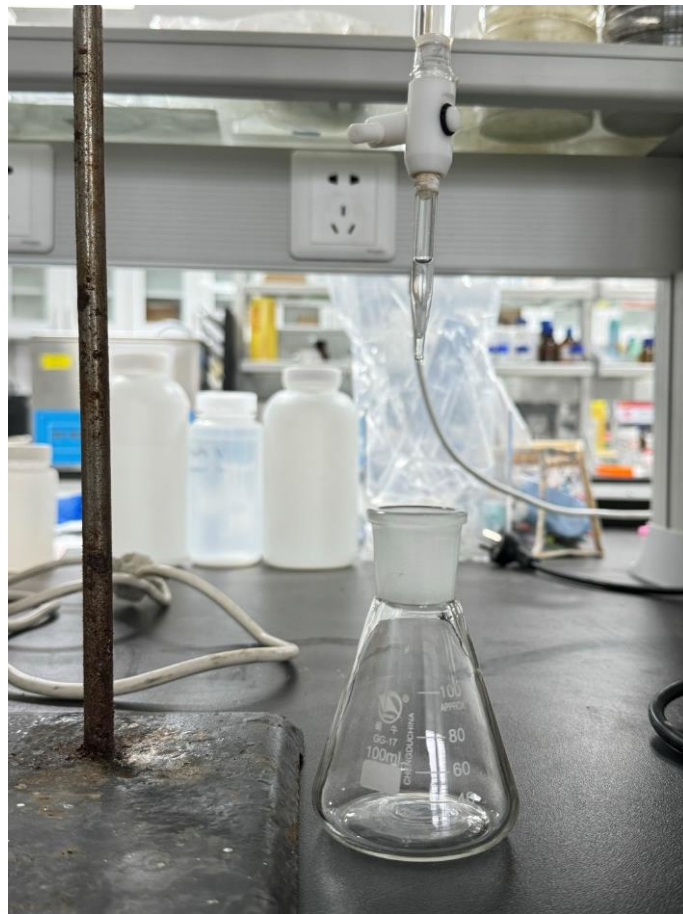

**Fig. S32** Schematic diagram of illustrating the determination of ClO<sup>-</sup>.

## References

- 1 W. Zhao, N. Wu, F. Yu, B. Zhou, X. Chu, Z. Wei and S. Yang, *ACS Appl. Energy Mater.*, 2021, **4**, 10976–10985.
- 2 T. Liang, S. Lenus, Y. Liu, Y. Chen, T. Sakthivel, F. Chen, F. Ma and Z. Dai, *Energy Environ Mater*, 2023, **6**, e12332.
- 3 S. Zhu, J. Lei, S. Wu, L. Liu, T. Chen, Y. Yuan and C. Ding, *Mater Lett*, 2022, **311**, 131549.
- 4 E. Saha, K. Karthick, S. Kundu and J. Mitra, *J. Mater. Chem. A*, 2021, **9**, 26800–26809.
- 5 Y. Dong, Z. Fang, W. Yang, B. Tang and Q. Liu, *ACS Appl. Mater. Interfaces*, 2022, **14**, 10277–10287.
- 6 W.-H. Huang, X.-M. Li, X.-F. Yang, H.-B. Zhang, F. Wang and J. Zhang, *Chem. Commun.*, 2021, **57**, 4847–4850.
- 7 X. Ren, Y. Tian, F. Shaik, J. Yang, R. Liu, K. Guo and B. Jiang, *Adv Sustainable Syst*, 2022, **6**, 2100436.
- 8 J. Wang, D. T. Tran, K. Chang, S. Prabhakaran, D. H. Kim, N. H. Kim and J. H. Lee, *ACS Appl. Mater. Interfaces*, 2021, **13**, 42944–42956.
- 9 D. Chinnadurai, S. J. Lee, Y. Yu, S. Y. Nam and M. Y. Choi, *Fuel*, 2022, **320**, 123915.
- 10 S.-C. Lim, C.-L. Chiang, C.-K. Peng, W.-B. Wu, Y.-C. Lin, Y.-R. Lin, C.-L. Chen and Y.-G. Lin, *Chem Eng J*, 2023, **452**, 139715.
- 11 H. Li, H. Fu, J. Yu, L. Wang, Y. Shi and L. Chen, *J Alloys Compd*, 2022, **922**, 166254.
- 12 P. Asen, A. Esfandiar and A. Iraj Zad, *Int J Hydrogen Energy*, 2022, **47**, 32516–32530.
- 13 T. L. L. Doan, D. T. Tran, D. C. Nguyen, D. H. Kim, N. H. Kim and J. H. Lee, *Adv Funct Mater*, 2021, **31**, 2007822.
